# Supplementary material for: Characterization of extended-spectrum-β-lactamase producing Klebsiellapneumoniae phage KP1801 and evaluation of therapeutic efficacy in vitro and in vivo
Source: PubMed Central journal article supplement (PMC7367294; doi:10.1038/s41598-020-68702-y), 2020-07-16
Supplement: 41598_2020_68702_MOESM3_ESM.pdf [file 41598_2020_68702_MOESM3_ESM.pdf]

**Characterization of extended-spectrum- $\beta$ -lactamase producing *Klebsiella pneumoniae* phage KP1801 and evaluation of therapeutic efficacy *in vitro* and *in vivo***

Phitchayapak Wintachai<sup>1\*</sup>, Ampapan Naknaen<sup>2</sup>, Jirapath Thammaphet<sup>1</sup>, Rattanaruji Pomwised<sup>2</sup>, Narumon Phaonakrop<sup>3</sup>, Sittiruk Roytrakul<sup>3</sup>, Duncan R Smith<sup>4</sup>

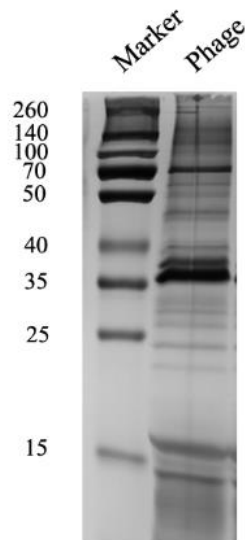

**Supplementary Figure S1.** Analysis of structural proteins of phage KP1801.

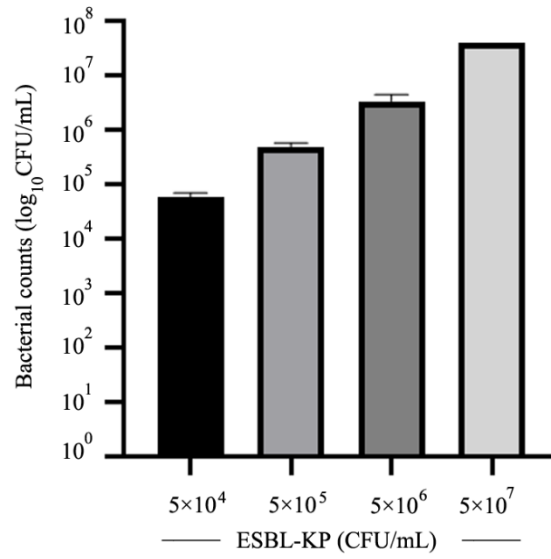

**Supplementary Figure S2.** Bacterial counts from infected *G.mellonella*. Experiments were undertaken independently in triplicate. The data show the mean±SD.
